# Supplementary material
Source: Royal Society of Chemistry journal article supplement (doi:10.1039/d5nr05523g)
Supplement: d5nr05523g1.pdf [file d5nr05523g1.pdf]

## Who Needs an Electrical Back-Contact after All

Md Ashiqur Rahman Laskar<sup>1</sup>, Md Jayed Hossain<sup>1</sup>, Srijan Chakrabarti<sup>1</sup>, Sanchari Sen<sup>1</sup>, Renee Sailus<sup>2</sup>, Youssry Botros<sup>3</sup>, Milan Pesic<sup>3</sup>, Rob Davenport<sup>3</sup>, Ondřej Novotný<sup>4</sup>, Jelínek Eduard<sup>4</sup>, Albert Davydov<sup>5</sup>, Ivan Sanchez Esqueda<sup>1</sup>, Seth Ariel Tongay<sup>2</sup> and Umberto Celano<sup>1\*</sup>

<sup>1</sup> School of Electrical, Computer, and Energy Engineering, Arizona State University, Tempe, AZ, 85281, USA

<sup>2</sup> School for Matter, Transport and Energy Engineering, Arizona State University, Tempe, AZ, 85287, USA

<sup>3</sup> Applied Materials Inc., 3050 Bowers Avenue, Santa Clara, CA, 95054, USA

<sup>4</sup> NenoVision s. r. o., Brno, 61200, Czech Republic

<sup>5</sup> Materials Science and Engineering Division, National Institute of Standards and Technology, Gaithersburg, MD, 20899, USA

\* Author to whom correspondence should be addressed: [umberto.celano@asu.edu](mailto:umberto.celano@asu.edu)

**Keywords:** electron-beam excited sensing, atomic force microscopy, self-sensing atomic force microscopy, EBC-AFM

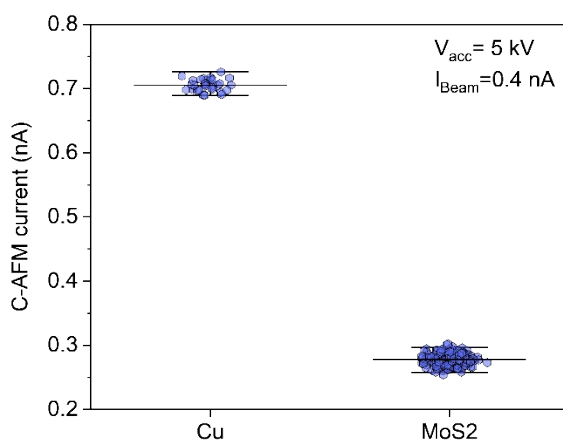

**Figure S1.** Detected C-AFM current upon e-beam irradiation on bulk Cu conductor and thin MoS<sub>2</sub>/SiO<sub>2</sub>/Si samples from the same distance of 100 μm. Cu conductor is 10 μm thick whereas MoS<sub>2</sub> has 3-4 monolayers, nearly 2 nm thin.

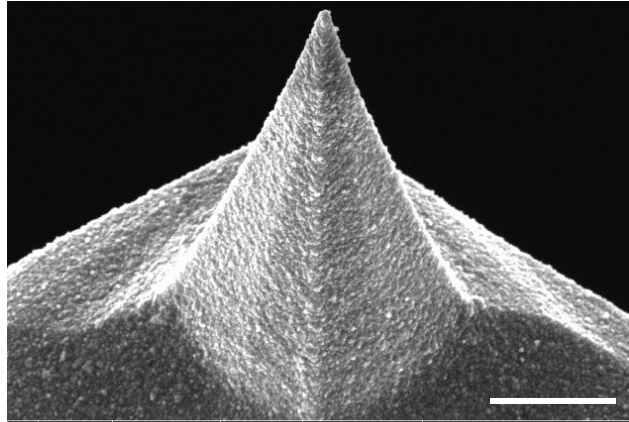

**Figure S2.** SEM image of a diamond-coated self-sensing probe. Scale bar is 2 μm.
